# Supplementary material for: Molecular basis for potentiation of Cx36 gap junction channel conductance byn-alcohols and general anesthetics
Source: Oxford University Press journal article supplement (doi:10.1042/bsr20171323), 2018-01-04

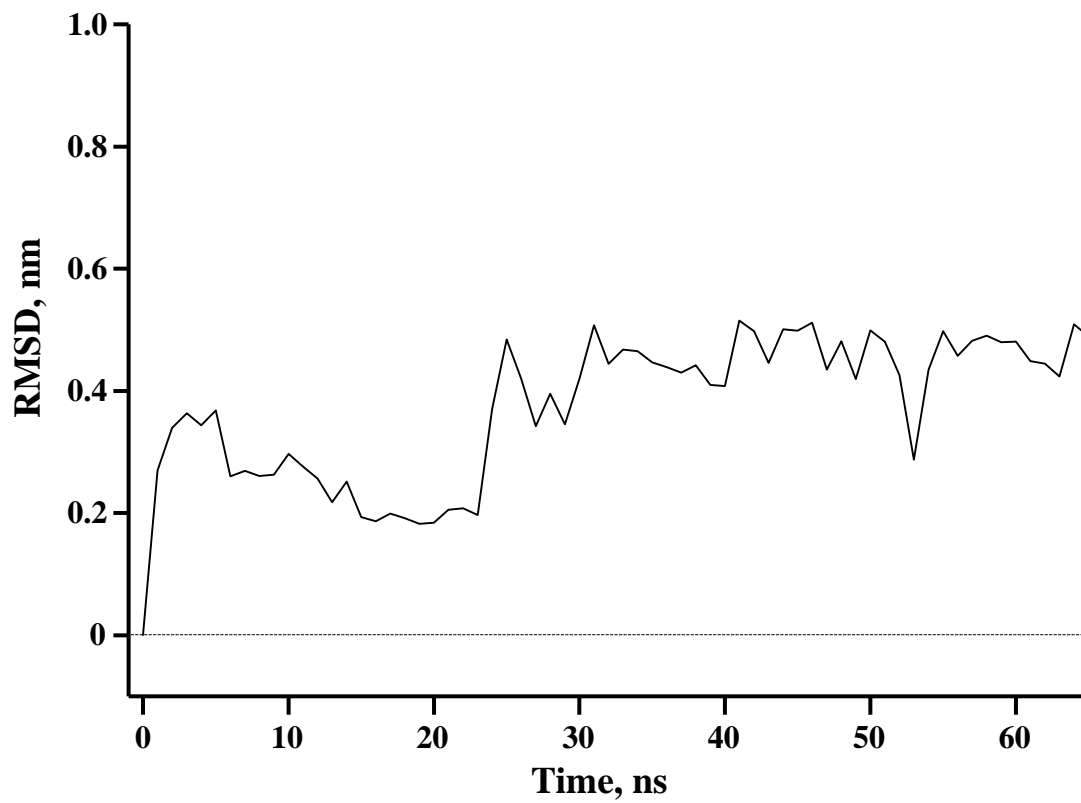

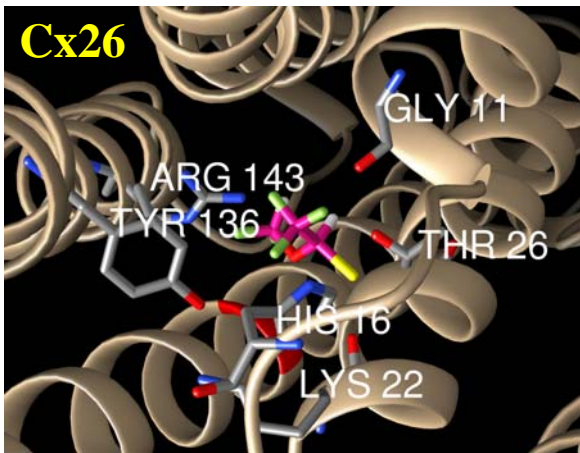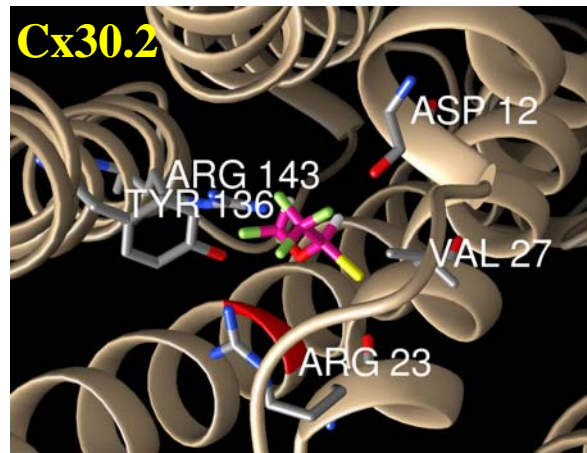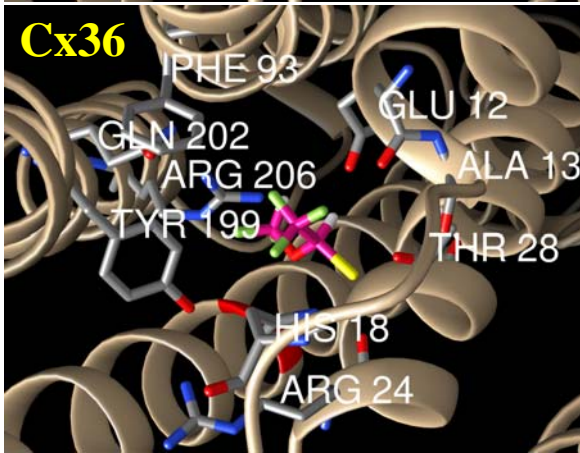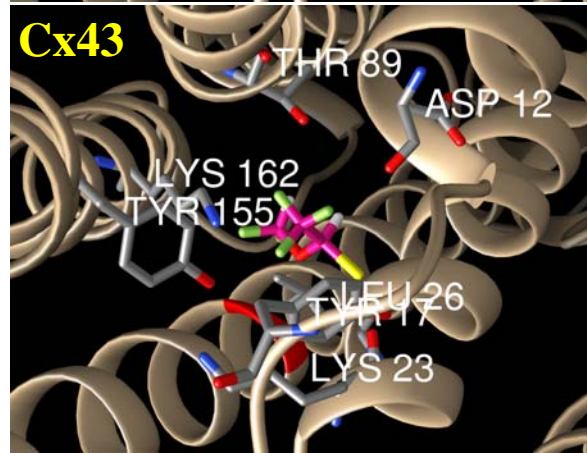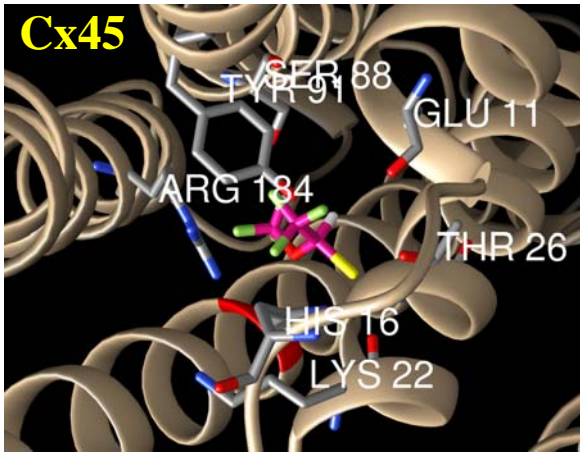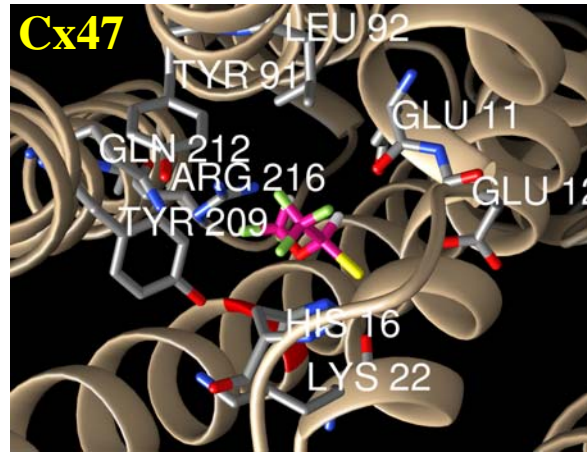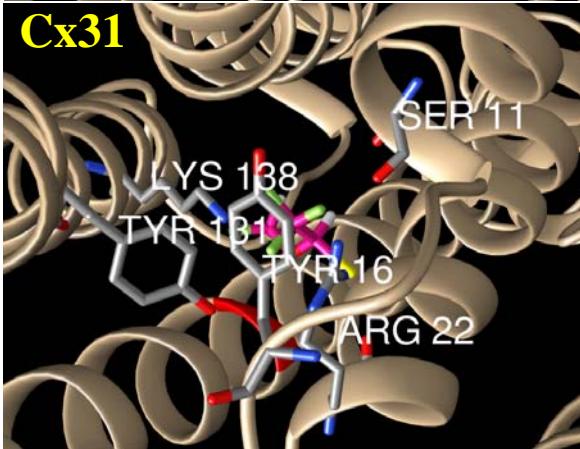

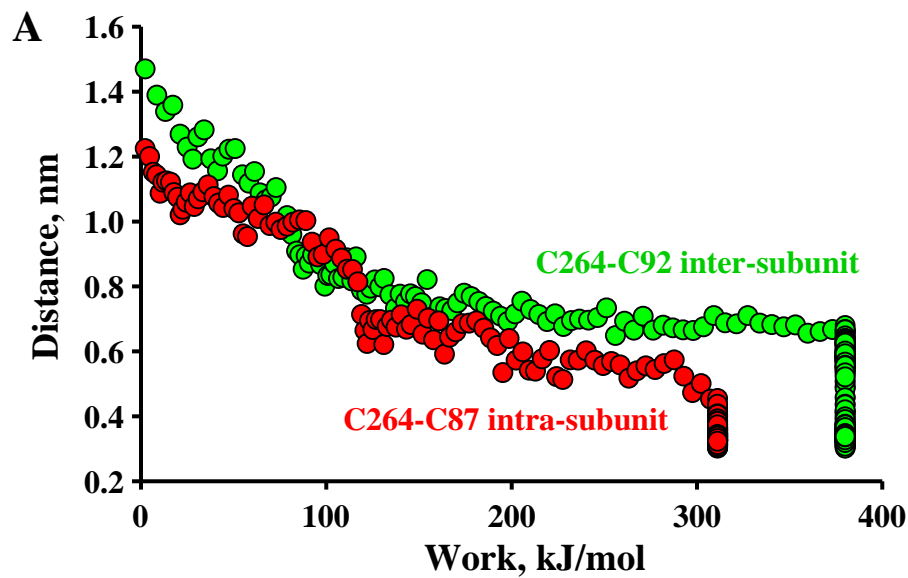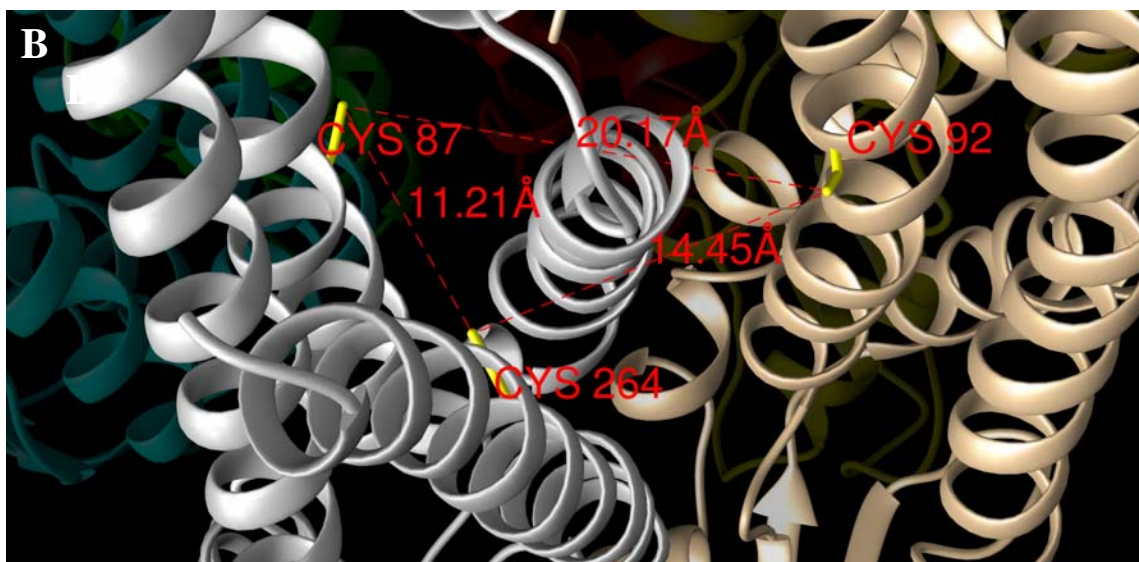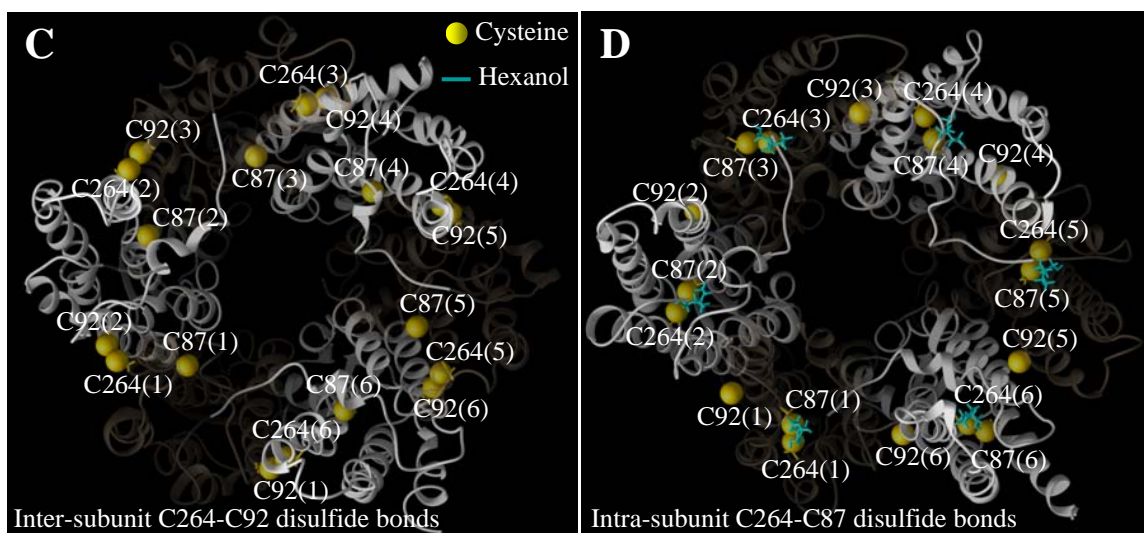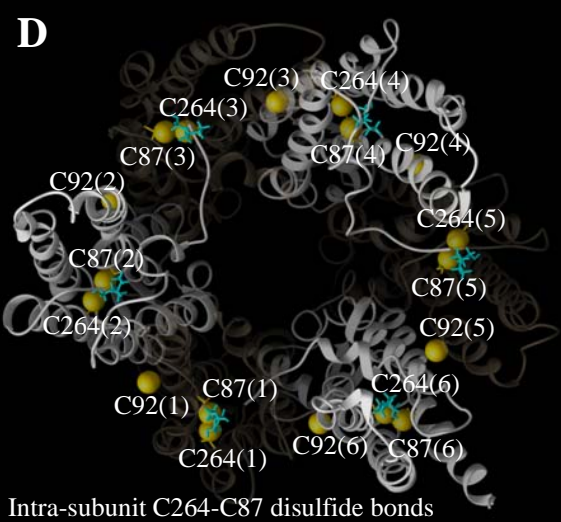

Supplement: bsr20171323_supp1.pdf [file bsr20171323_supp1.pdf]
